# Supplementary material
Source: PubMed Central journal article supplement (PMC4359589)

**A** drift-corrected image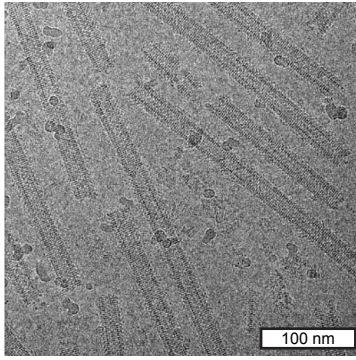

power spectrum

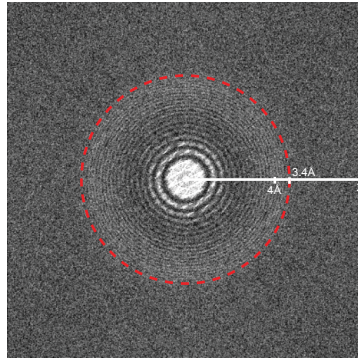**B**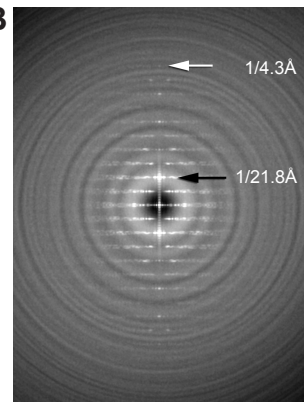**C**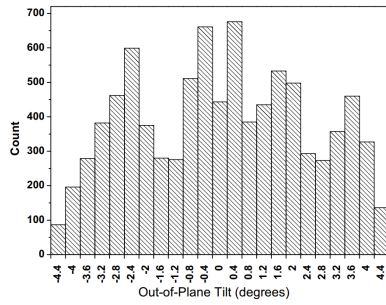**D**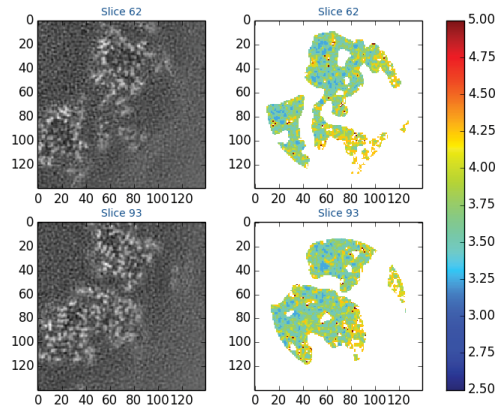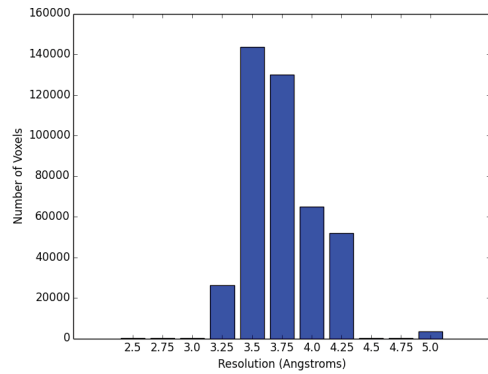**G**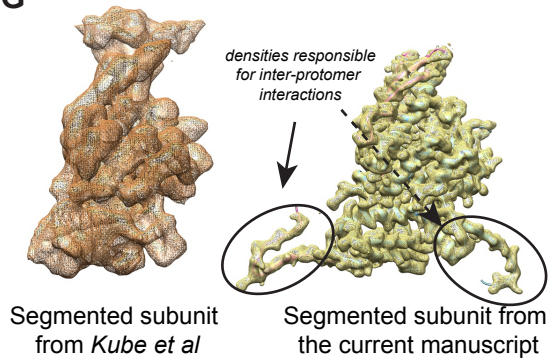**E**

Projection through a CTF corrected, B-factor sharpened structure, all slices.

Projection, middle slices 80 Å thick

2D class averages Phase flipped

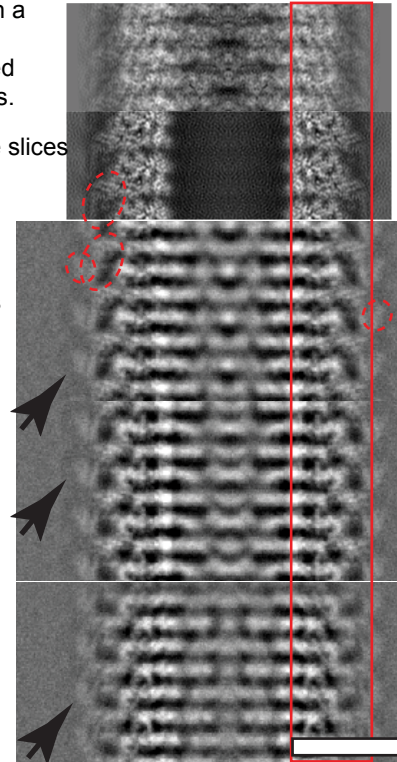**F**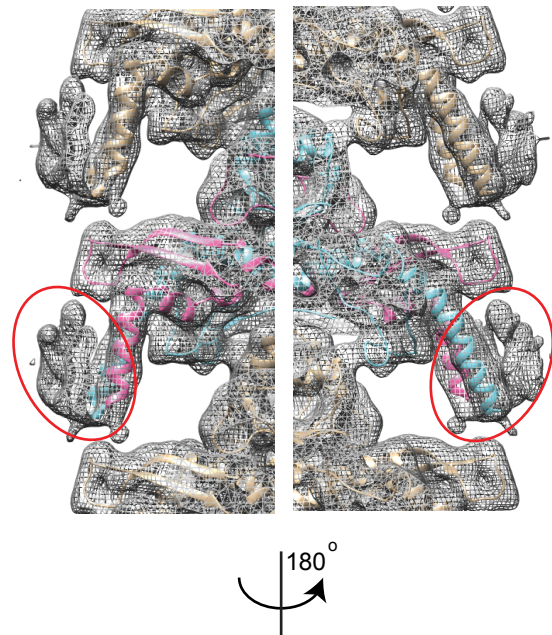

Supplement: NIHMS664731-supplement-1.pdf [file NIHMS664731-supplement-1.pdf]
