# Supplementary material
Source: PubMed Central journal article supplement (PMC4359589)
Supplement: NIHMS664731-supplement-3.pdf [file NIHMS664731-supplement-3.pdf]

|                |     |                                                                                                                                                                 |
|----------------|-----|-----------------------------------------------------------------------------------------------------------------------------------------------------------------|
| VipA/VipB      | 1   | M S K E G S V A P K E R I N I K Y I P A T G D A Q A E . V . . E L . . . P . . . . . L . K T L V V G D F K G H A . E Q T                                         |
| Lin1278        | 1   | . . . . . . . . . . . . . . . . . . . . . P . G I Y T N F . K A A . A A E R T K A G E R G T V A L P L A . A S W G A . . A                                       |
| gp18           | 1   | . . . . . . . . . . . . . . . . . . . . . N . N S . . . T G T A A L A G K . F Q W G P . . A                                                                     |
| VipA H1        |     |                                                                                                                                                                 |
| VipA/VipB      | 48  | P L E E R A T V T V . D . K N N F E A V . . M R E S E L K I T A T V K N K L T D D E N A E L P V E L N F K S L A D F A P                                         |
| Lin1278        | 35  | . . . . . K E F V E I N K . E E D V . . E K K L . G . . . . . . . . . . . . . . . L S L A H Q . .                                                               |
| gp18           | 19  | . . . . . F Q I K Q V T N E V . D L V . N . . T . . F . . . . . . . . . . . G . . . . Q P . .                                                                   |
| VipA   VipB    |     |                                                                                                                                                                 |
| VipA/VipB      | 104 | D A V A S Q V P E L K K L I E L R E A L V A L N K S L V D Q M L V E L D K K I S A Q M D E I L H N S Q F Q A M E S A W R                                         |
| Lin1278        | 58  | . . . . . . . . . . . . . . . . . . . . . . . . . . . . . . . . . . . . . . . . . . . . . . . . . . . . S . . . . F L                                           |
| gp18           | 38  | . . . . . . . . . . . . . . . . . . . . . . . . . . . . . . . . . . . . . . . . . . . . . . . . . . . . T A E T A D Y F M                                       |
| VipB $\beta$ 1 |     |                                                                                                                                                                 |
| VipA/VipB      | 164 | G L K L F V D R T D F R E N N K V E I L H V . . . . . . . . . . . . . . . . . . . . . . . . . . . . . . . . .                                                   |
| Lin1278        | 61  | L L R E T L K L A . . . . . K T V L V Y R L N D . . . G I K A T A . . . . . . . . . . . . . . . . . . . . .                                                     |
| gp18           | 47  | S A M N F L Q Y G . . . . . N D L R V V R A V D R D T A K N S S P I A G N I E Y T I S T P G S N Y A V G D K I T V K Y V                                         |
| VipA/VipB      | 186 | . . . . . . . . . . . . . . . . . . . . . . . . . . . . . . . . . . . . . . . . . . . . . . . . . . . .                                                         |
| Lin1278        | 86  | . . . . . . . . . . . . . . . . . . . . . . . . . . . . . . . . . . . . . . . . . . . . . . . . . . . .                                                         |
| gp18           | 102 | S D D I E T E G K I T E V D A D G K I K K I N I P T A K I I A K A K E V G E Y P T L G S N W T A E I S S S S S G L A A V                                         |
| VipA/VipB      | 186 | . . . . . . . . . . . . . . . . . . . . . . . . . . . . . . . . . . . . . . . . . . . . . . . . . . . .                                                         |
| Lin1278        | 86  | . . . . . . . . . . . . . . . . . . . . . . . . . . . . . . . . . . . . . . . . . . . . . . . . . . . . T L A T . . . D V V . V T A K Y G G I V G N S I T I K V |
| gp18           | 162 | I T L G K I I T D S G I L L A E I E N A E A A M T A V D F Q A N L . . . K K Y G I P G V V A L Y P G E L G D K I E I E I                                         |
| VipA/VipB      | 186 | . . . . . . . . . . . . . . . . . . . . . . . . . . . . . . . . . . . . . . . . . . . . . . . . . . . .                                                         |
| Lin1278        | 110 | D . . . . . E . . . . . . . . . . . N V . . V . D S S K . . . . . K D V T T Y L N E V A V D K Q V V G                                                           |
| gp18           | 219 | V S K A D Y A K G A S A L L P I Y P G G G T R A S T A K A V F G Y G . . P Q T D S Q Y A I I V R R N D A I V Q S V V L .                                         |
| VipB H3        |     |                                                                                                                                                                 |
| VipA/VipB      | 186 | . . . . . . . . . . . . . . . . . . . . . . . . . . . . . . . . . . . . . . . . . . . . . . . . . . . . T K                                                     |
| Lin1278        | 137 | T A S E . . . . . L I . . . D . . . S N . . Y V S F . K T T S T S E L Q Q S S G T T L V G G T D Q P . . V T                                                     |
| gp18           | 276 | . S T K R G G K D I Y D S N I Y I D D F F A K G G S E Y I F A T A Q N W P E G F S G . I . . L T L S G G L S S N A E V T                                         |
| VipA/VipB      | 188 | D . E L L E D . F E F A P E T A Q S G . L Y K H V Y . . S A G Y G Q F G G E P V G A I I G . N Y A . F T P S . T P D M K                                         |
| Lin1278        | 175 | N L D Y T . Q . . . . . F L V . S A E . . . . G . E . . . . Y F D T I A F . . P V . S S S D . V A L . .                                                         |
| gp18           | 332 | A G D L M . E A . . . . . W . D . F F A D R E S . V . . . . . D V Q L F I A G S C A G E S L E T A S T . V                                                       |
| VipA/VipB      | 240 | L L Q Y M G A L G . A . . M . A H A P F I S S V G P E F F G I D S F E E L P N I K D . L K S . . T F . E S P . . K .                                             |
| Lin1278        | 205 | K T S F V S F V K R R D E Q G V K I K G V V A N . . . . . . . . . . . . . . . . . . . . . P . . . . .                                                           |
| gp18           | 370 | Q K H V V S I G D V . . . R . Q D C L V L C S P P R E T . . . V V G I P V T R A . . V D . N L V N W R T A A G S Y T D                                           |
| VipA/VipB      | 287 | . Y T K . W R S L R E S E D A R Y L G L T A P R F L L . R . . . . . V P Y D P I E N P V K S F N Y A E N V S A S H E H                                           |
| Lin1278        | 230 | . . . . . A D . . . Y E G I I N V R N G V T L R D . . . . . G . . . . . . . . . . . . . . . . . . . . .                                                         |
| gp18           | 419 | N N . . F N . I S . . . . S T Y A A I D G N Y K Y Q . Y D K Y N D V N . . . . . . . . . . . . . . . . . . . . .                                                 |
| VipA/VipB      | 338 | Y L W G . . . N T A F A F A T R L T D S F A K Y R W C . P N I I G P Q S G G A V E D L P V H V F E S M G A L Q S K I P T                                         |
| Lin1278        | 248 | . T I L E P H Q V V A W V A G A D A S A . . . . . S . L K S N T . F . . . . V K Y D G A I . . . . . D A                                                         |
| gp18           | 446 | . R W V . . . P L A A D I A G L C A R T . . . . . D N . V . . R . . . . G Q I L N V I . . . . . K L                                                             |
| VipA/VipB      | 394 | E V L I T D R K E F E L A E E G F I A L T M R K G S D N A A F F S A N S I Q K P K V F P N T K E G K E A E T N Y K L G T                                         |
| Lin1278        | 283 | T P R L A N D E A E E A L Q N G E F V L T F D A R D K A V Y V E Q D L N S L T T F . S . . . . . K E . K S S K F R                                               |
| gp18           | 475 | A I E . . Q A Q R D R L Y Q E A I N P V T G T G G . . . D G Y V L Y G D K T A T . S . . . . . . . . . . V P S P . .                                             |
| VipA/VipB      | 454 | Q L P Y M M I I N R L A H Y V K V L Q R E Q I . . . . . G A W . K E . R Q D L E R E . L N S W I K Q Y V A . D Q E                                               |
| Lin1278        | 333 | K N K I S R I L D G I N N D T R R N I L D A I K E R K D A N T D I P A D E N G V Q F I L S . Q T A Y L N E L Q D S . .                                           |
| gp18           | 515 | . . N V R R L F N M L K T N I G R S . S K Y R L . . F . . . . E . L N N A F T R S S F R T E T A Q Y L Q G N K A L . . .                                         |
| VipA/VipB      | 502 | N P P A D V R S R R P L R . A A . . . R I E V M . . . . . D V E G N P G W Y Q V S L S V R P H F K . . . . .                                                     |
| Lin1278        | 389 | . . . . . G A I T N F D S T A D I T V S . . . . . L N N . N V D G F I V N Q S I E P V D S G E K F Y F T T E                                                     |
| gp18           | 562 | . . . . . G G I Y E Y R V V C D T T N N T P S V I D R N . . . . . E F V A T F Y I Q P A R S I N Y I T L N F V                                                   |
| VipA/VipB      | 542 | . . . . . Y M G A N F E L S L V G R L D Q A .                                                                                                                   |
| Lin1278        | 432 | V K L E . . . . . H                                                                                                                                             |
| gp18           | 607 | A T . A . . . . .                                                                                                                                               |

conserved

Domains 3&4 of Lin1278 and gp18

Domain 3 of VipA/VipB
