# Supplementary material
Source: PubMed Central journal article supplement (PMC4359589)
Supplement: NIHMS664731-supplement-5.pdf [file NIHMS664731-supplement-5.pdf]

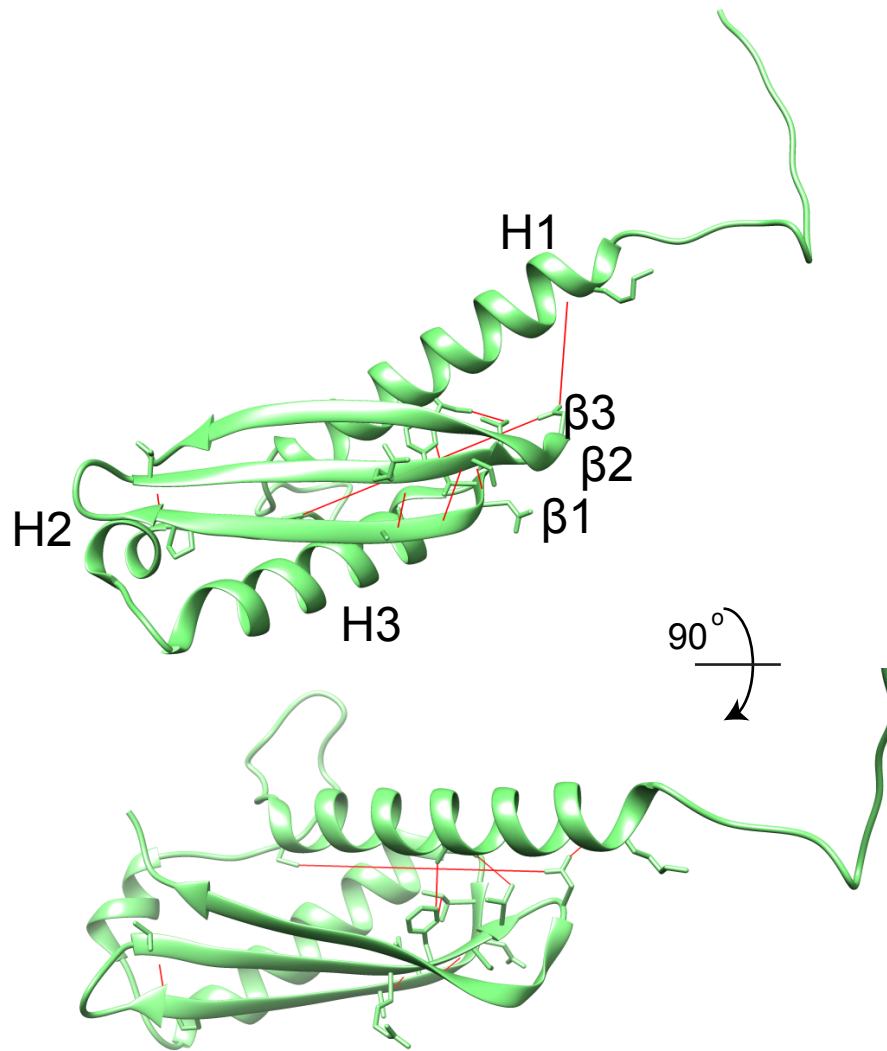

## Evolutionary constraints for $\beta 2$

| Residue 1 | Residue 2 | Gremlin Scaled Score | Secondary structure element |
|-----------|-----------|----------------------|-----------------------------|
| 112 V     | 32 I      | 1.913                | Helix 1                     |
| 111 S     | 91 L      | 1.795                | Beta 1                      |
| 109 R     | 92 A      | 1.705                | Beta 1                      |
| 110 F     | 88 I      | 1.408                | Beta 1                      |
| 111 S     | 89 D      | 1.176                | Beta 1                      |
| 110 F     | 32 I      | 1.13                 | Helix 1                     |
| 114 D     | 55 C      | 1.061                | loop                        |
| 103 T     | 97 P      | 1.034                | Beta 1                      |
| 114 D     | 21 K      | 1.006                | Helix 1                     |
