# Supplementary material
Source: PubMed Central journal article supplement (PMC4359589)

**A. VipA 1-126, 127-168 - predicted**

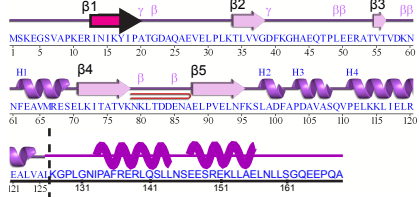

**B. VipB 61-492, 1-60 - predicted**

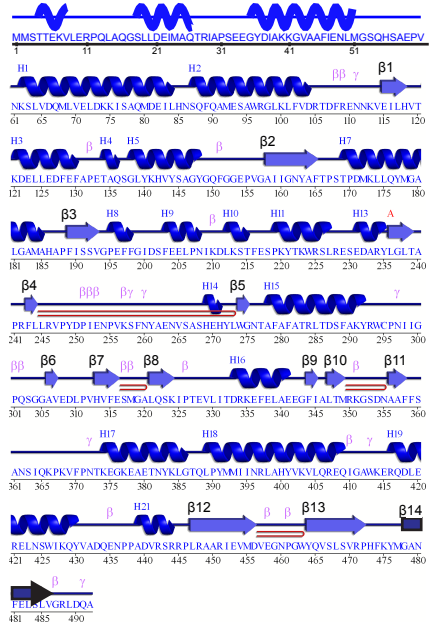

**C**

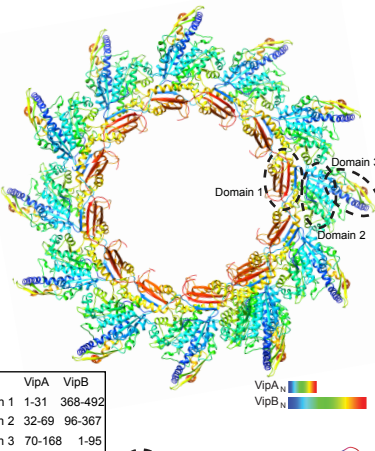

| VipA            | VipB    |
|-----------------|---------|
| Domain 1 1-31   | 368-492 |
| Domain 2 32-69  | 96-367  |
| Domain 3 70-168 | 1-95    |

**D**

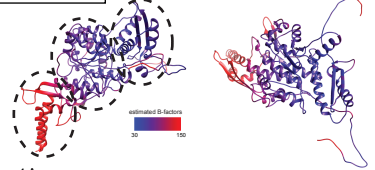

**E**

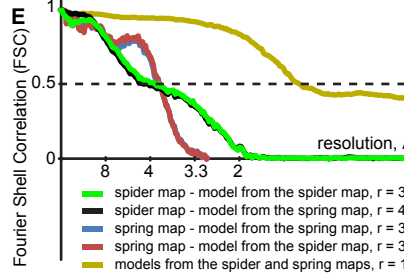

**F**

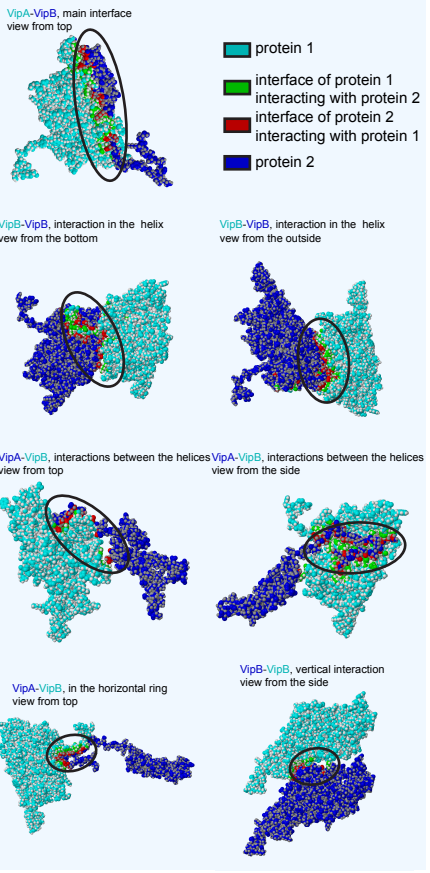

Supplement: NIHMS664731-supplement-2.pdf [file NIHMS664731-supplement-2.pdf]

# A residue conservation

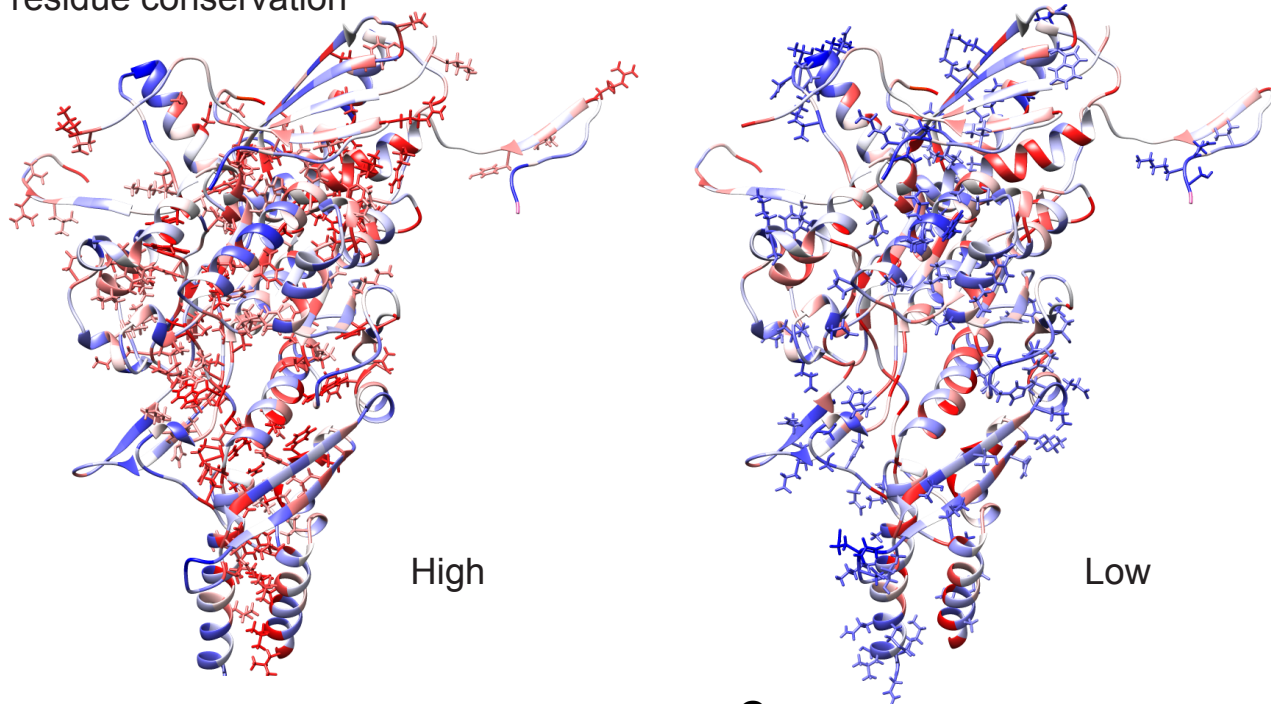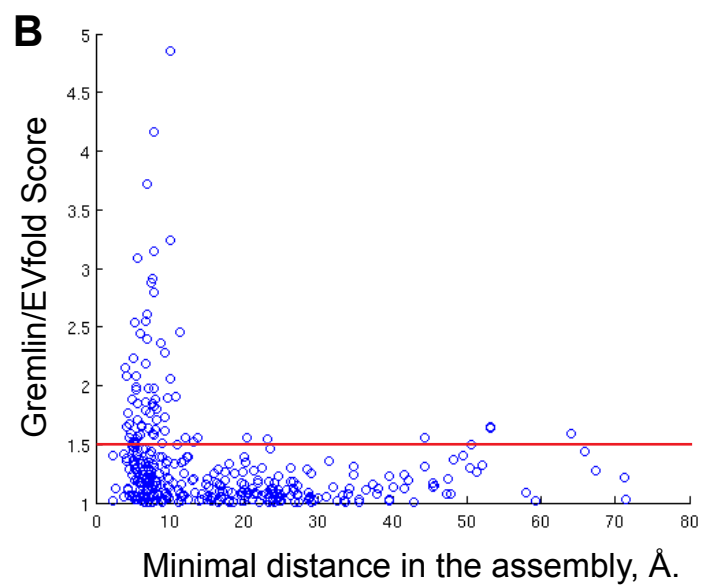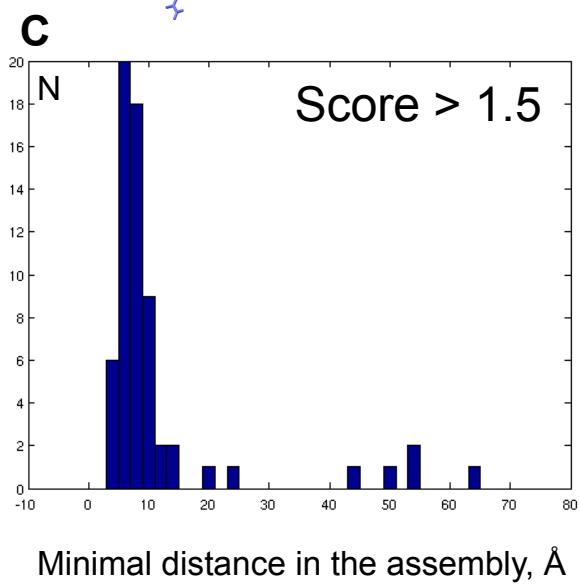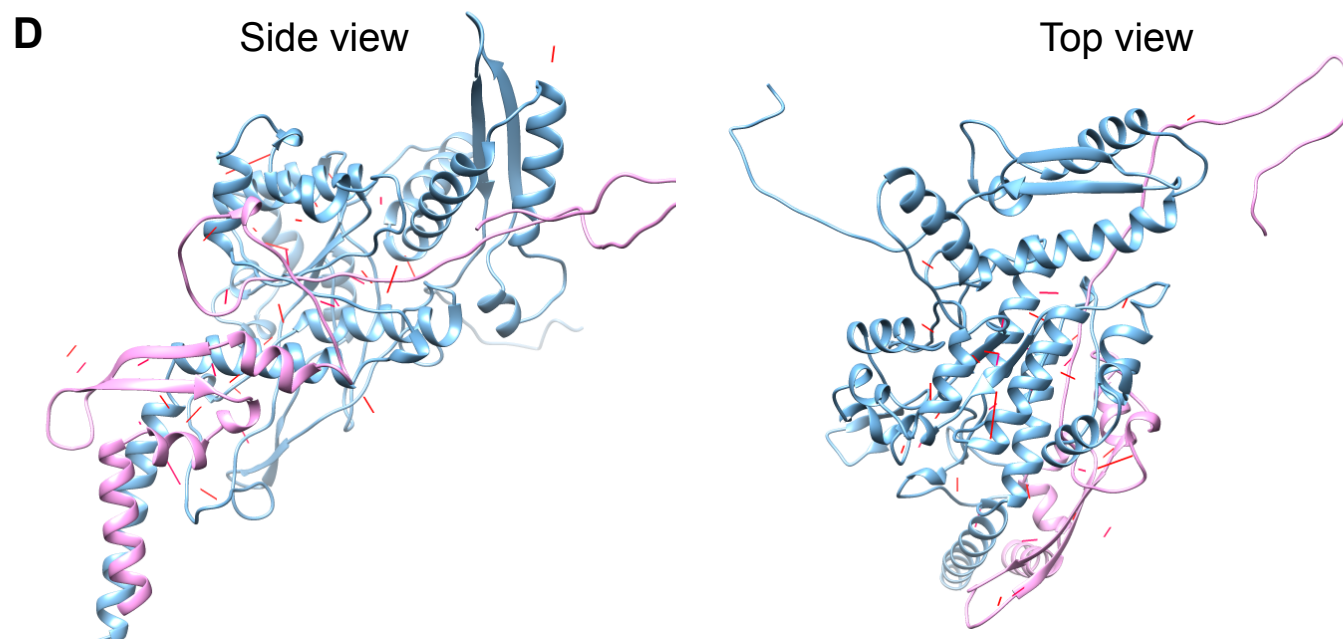

Supplement: NIHMS664731-supplement-4.pdf [file NIHMS664731-supplement-4.pdf]
